# Supplementary material
Source: PubMed Central journal article supplement (PMC7786450)
Supplement: NIHMS1604610-supplement-Supplemental_Information.pdf [file NIHMS1604610-supplement-Supplemental_Information.pdf]

**Cell Reports, Volume 31**

**Supplemental Information**

**Acute Myeloid Leukemia iPSCs Reveal  
a Role for RUNX1 in the Maintenance  
of Human Leukemia Stem Cells**

**Josephine Wesely, Andriana G. Kotini, Franco Izzo, Hanzhi Luo, Han Yuan, Jun Sun, Maria Georgomanoli, Asaf Zviran, André G. Deslauriers, Neville Dusaj, Stephen D. Nimer, Christina Leslie, Dan A. Landau, Michael G. Kharas, and Eirini P. Papapetrou**

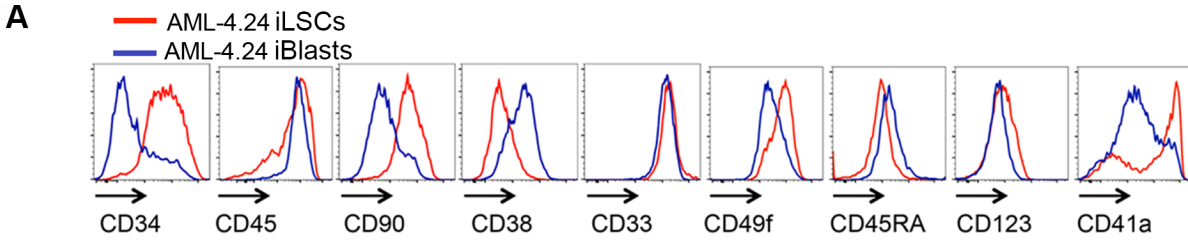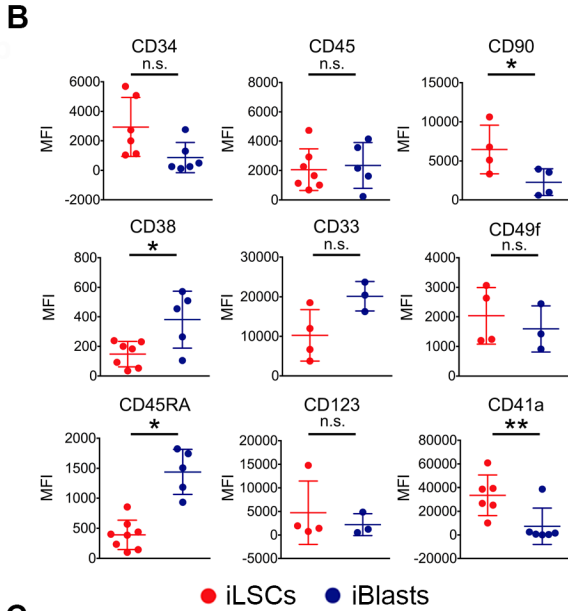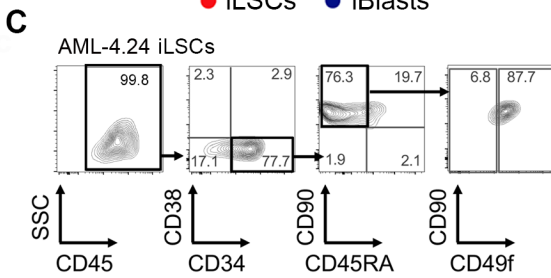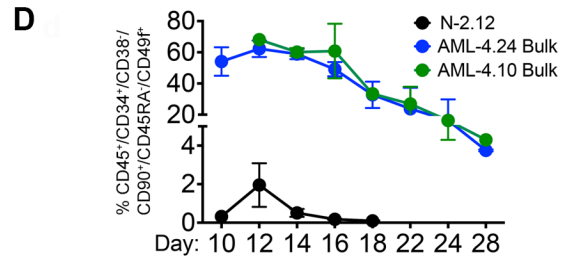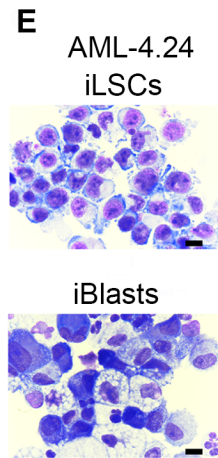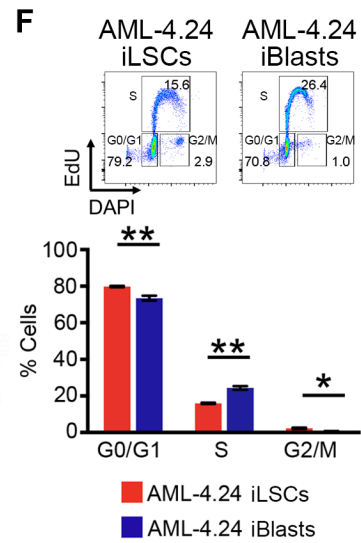

## Supplemental Figure and Table Legends

### Figure S1. Phenotypic heterogeneity of hematopoietic cells derived from AML-iPSCs (related to Figure 1).

(A) Expression of hematopoietic markers by flow cytometry in iLSCs and iBlasts from the AML-4.24 iPSC line on day 23 of differentiation. (B) Expression of the indicated hematopoietic markers in iLSCs and iBlasts measured as mean fluorescence intensity (MFI). Mean and SEM from 3-7 different experiments including both AML-4.10 and AML-4.24 iPSC lines are shown. \* $p < 0.05$ , \*\* $p < 0.001$ , t test. (C) HSC markers in iLSCs from the AML-4.24 iPSC line on day 16 of hematopoietic differentiation. (D) Time course of the fraction of immunophenotypic HSCs (CD45+/CD34+/CD38-/CD90+/CD45RA-/CD49f+) at the indicated days of hematopoietic differentiation cultures from normal iPSCs (N-2.12 line) and from the two AML lines AML-4.24 and AML-4.10 (without separation of adherent/suspension fractions). Mean and SEM from 2-3 independent experiments are shown. (E) Wright-Giemsa-stained cytopins of manually separated cells. Scale bar, 10  $\mu\text{m}$ . (F) Cell-cycle analysis of iLSCs and iBlasts from the AML-4.24 iPSC line. Mean and SEM from 3 independent experiments are shown. \* $p < 0.05$ , \*\* $p < 0.001$ , t test.

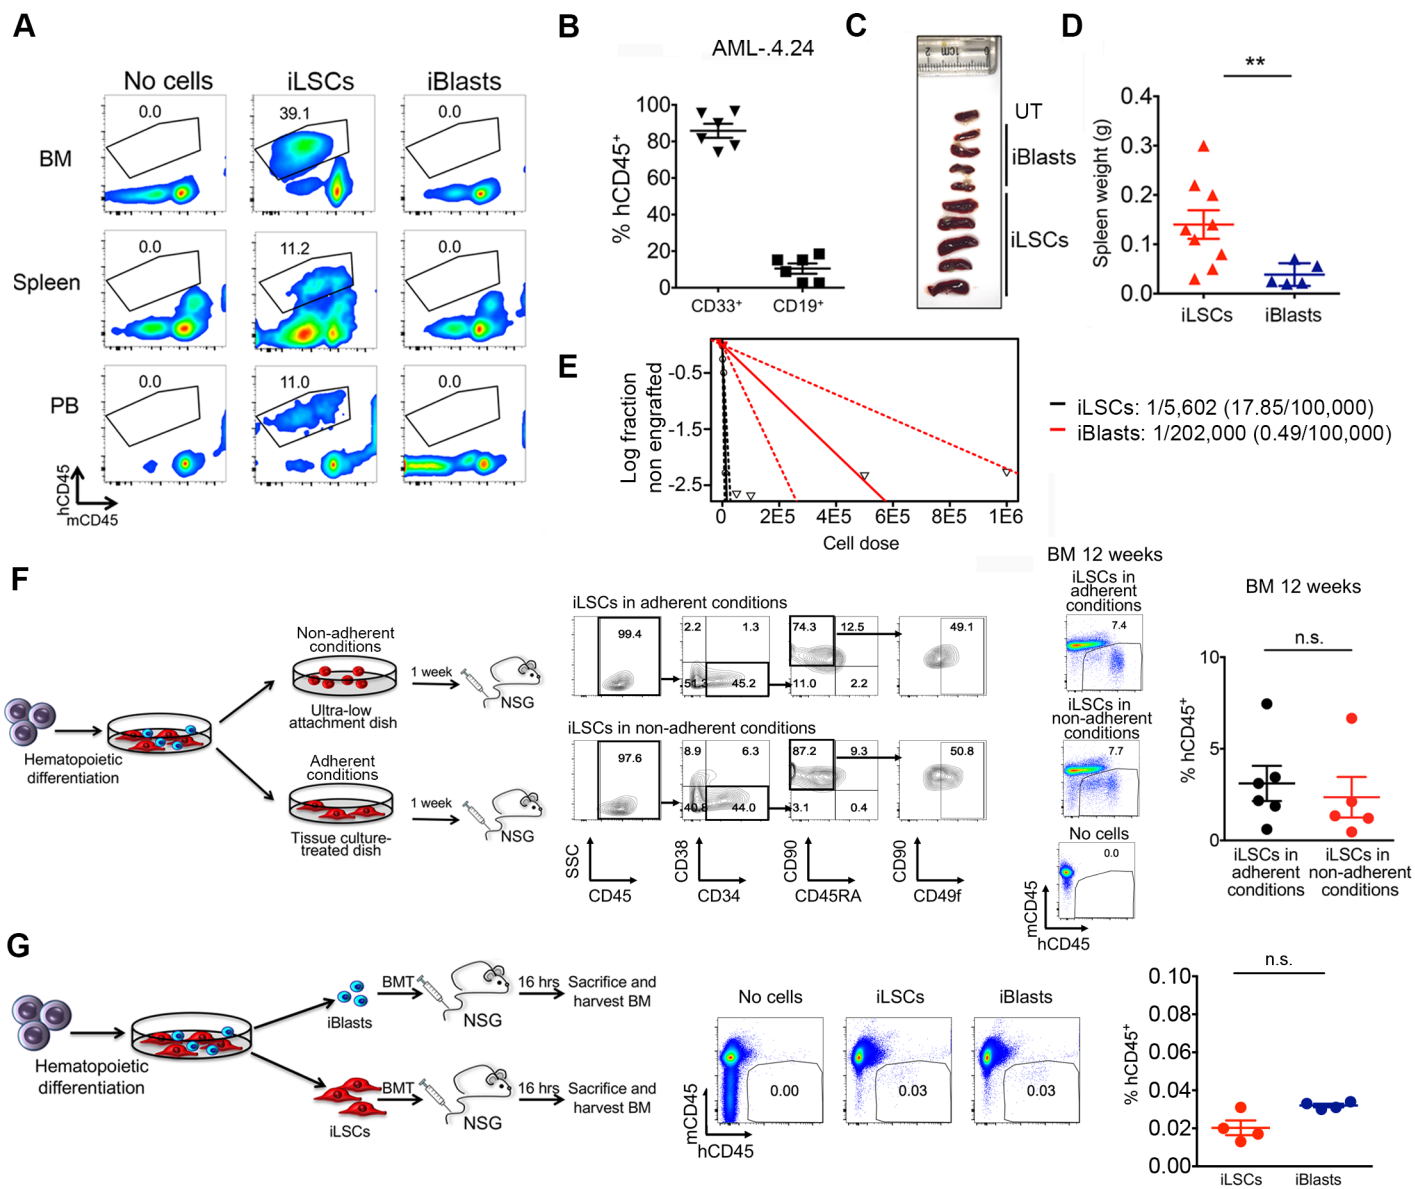



**Figure S2. iLSCs serially transplant a lethal leukemia in NSG mice (related to Figure 2).**

(A) Representative flow cytometry panels assessing human cell engraftment of iLSCs and iBlasts in the BM, spleen and peripheral blood (PB) of recipient mice 8-12 weeks post-transplantation. (B) Fraction of myeloid (CD33<sup>+</sup>) and lymphoid (CD19<sup>+</sup>) lineage cells within the hCD45<sup>+</sup> population in the BM of mice transplanted with iBlasts. (C) Representative picture of spleens from one transplantation experiment. Spleens from 4 mice injected with iBlasts, 5 mice injected with iLSCs and one untransplanted (UT) mouse are shown. (D) Spleen weight of mice transplanted with iLSCs and iBlasts 8-12 weeks post-transplantation. \*\*p<0.001, t test. (E) Frequency of leukemia initiating cells in iLSCs and iBlasts calculated based on limiting dilution analysis (95% confidence interval). (F) Left panel: Experimental scheme. Middle panel: Flow cytometry analysis of HSC markers at the end of a 1 week culture in adherent vs non-adherent conditions and before transplantation into mice (one of two experiments). Right panels: BM engraftment at 12 weeks. Representative mice (left) and cumulative data (right) from two independent differentiation and transplantation experiments. (G) Left panel: Experimental scheme. Middle and right panels: Detection levels of hCD45<sup>+</sup> cells in mouse BM 16 hours following iv injection. Representative mice (middle) and cumulative data (right) from two independent differentiation experiments (with 2 mice per group per experiment).

**A**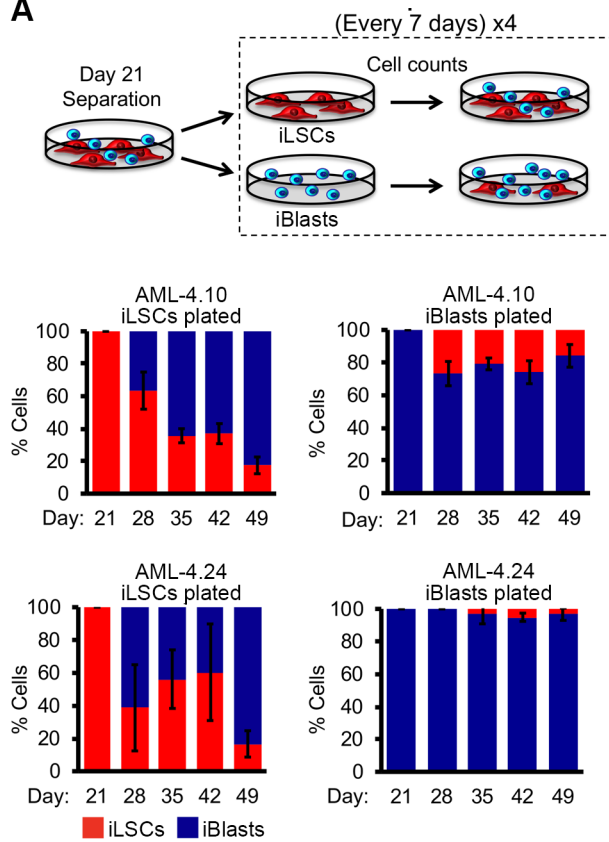**B**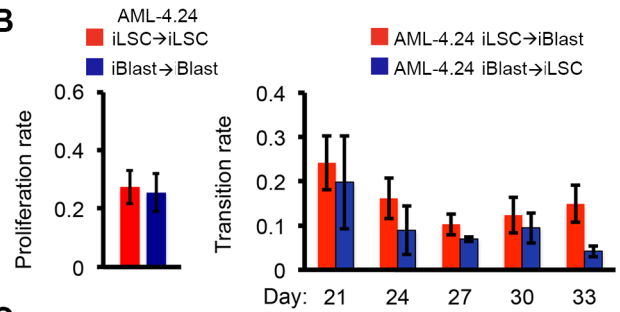**C**

Poisson distribution

| Estimated number of GFP <sup>+</sup> iLSCs per well | Estimated number of wells | % of wells |
|-----------------------------------------------------|---------------------------|------------|
| 0                                                   | 45                        | 48         |
| 1                                                   | 33                        | 35         |
| 2                                                   | 12                        | 13         |
| 3                                                   | 3                         | 3          |

**D**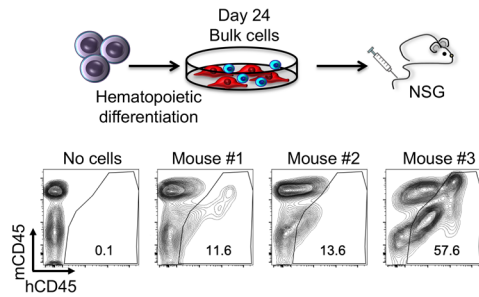

**Figure S3. iLSCs give rise to iBlasts (related to Figure 3).**

(A) Upper panel: Schematic of experimental setup. iLSCs and iBlasts were separated on day 21 of hematopoietic differentiation and counted. Every 7 days for 4 weeks, iLSCs and iBlasts were separated, counted and plated back. Lower panels: Fraction of iLSCs and iBlasts in cultures initiated from separated iLSCs (left panels) or iBlasts (right panels) from lines AML-4.10 (middle panels) and AML-4.24 (lower panels) at the indicated time points. Mean and SEM of 3 independent experiments are shown. (B) Proliferation rate (left) and transition rate (right) of cells derived from line AML-4.24, calculated as shown in Table S1. Mean and SEM from 3 independent experiments are shown. Proliferation rate is averaged across all time points. (C) Poisson distribution of single cell plating experiment shown in Figure 3C. Based on the number of GFP<sup>+</sup> wells (45 of a total of 93 wells assessed for GFP), the number of wells predicted to have 1, 2 or 3 GFP<sup>+</sup> iLSCs plated are estimated. (D) Upper panel: Schematic of experiment. Bulk cells from day 24 of hematopoietic differentiation of the AML-4.10 line were intravenously injected into sublethally irradiated or busulfan-treated NSG mice. Lower panels: Human cell engraftment in the BM of 3 recipient mice 10 weeks post-transplantation.

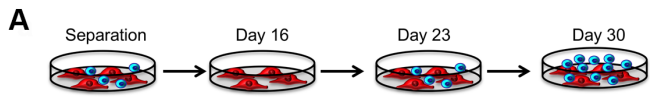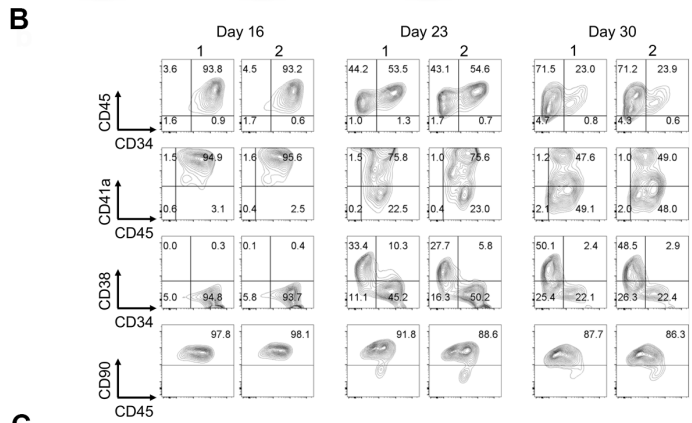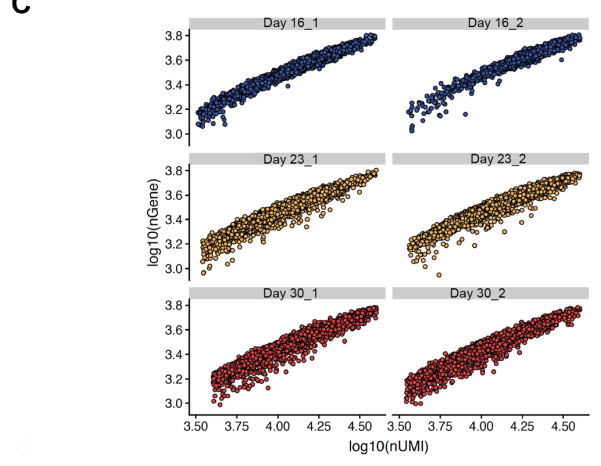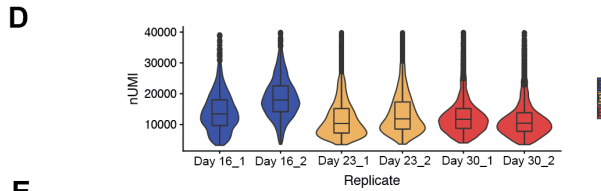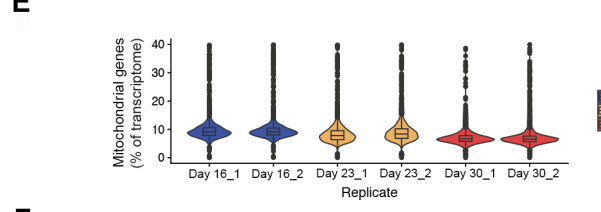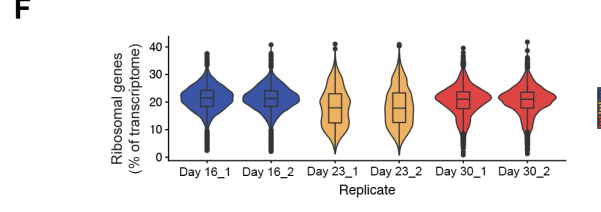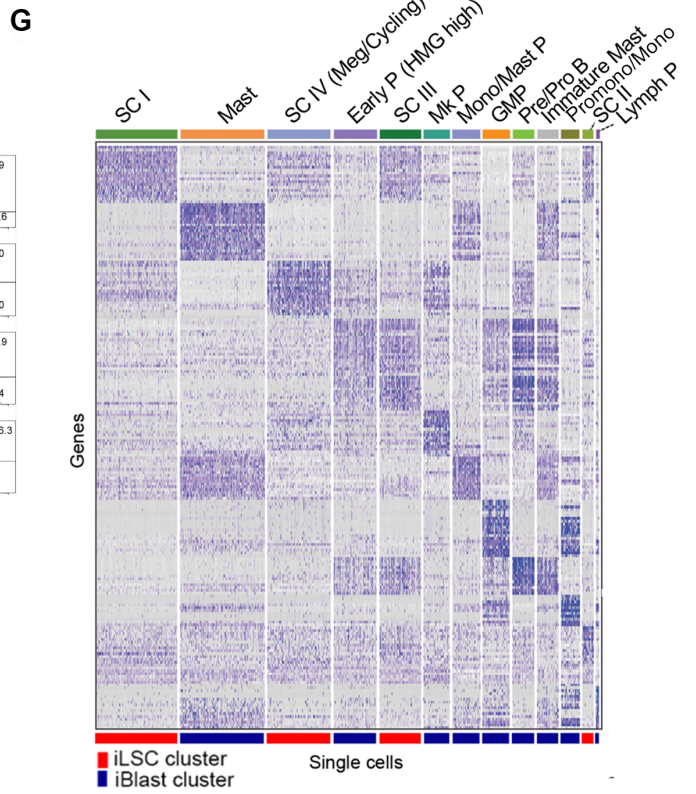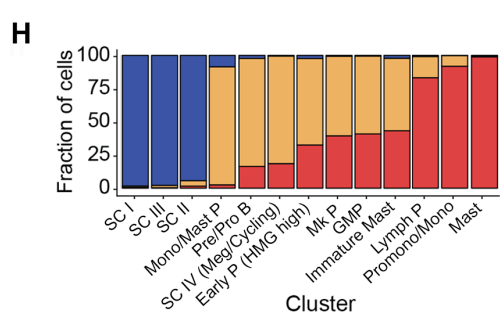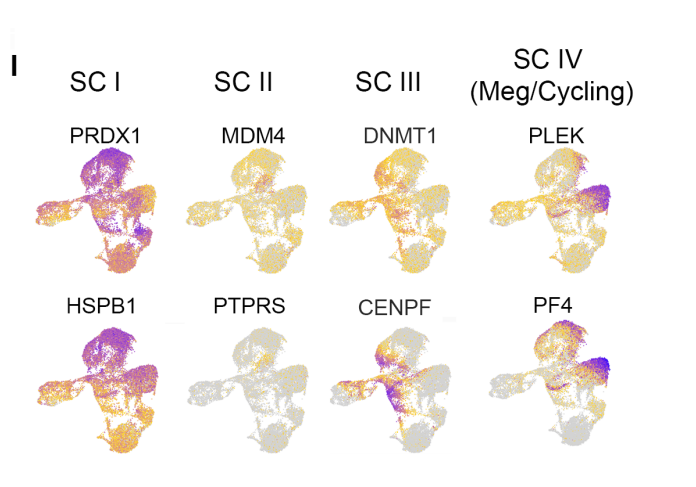

**Figure S4. Single cell transcriptome analysis (related to Figure 4).**

(A) Scheme of experimental setup for scRNAseq analyses. iLSCs were separated on day 16. Cells were harvested on day 16 (corresponding to isolated iLSCs), day 23 and day 30. (B) Immunophenotypes of duplicate samples analyzed by scRNA-seq at the indicated time points. (C) Number of unique molecular identifiers (nUMI) vs number of genes (nGene) detected per cell in each sample. (D) Violin plots of numbers of UMIs per cell for each sample. (E) Violin plots showing the percentage of mitochondrial genes per cell in each sample. (F) Violin plots showing the percentage of ribosomal genes per cell in each sample. (G) Heatmap of 13 clusters across all single-cell transcriptomes. Cluster annotation (top) was based on manual curation of marker genes. (H) Fraction of cells in each cluster corresponding to the 3 different sampling time points. (I) Expression of selected genes differentiating the 4 SC clusters, projected onto the UMAP plot from Figure 4B.

**A**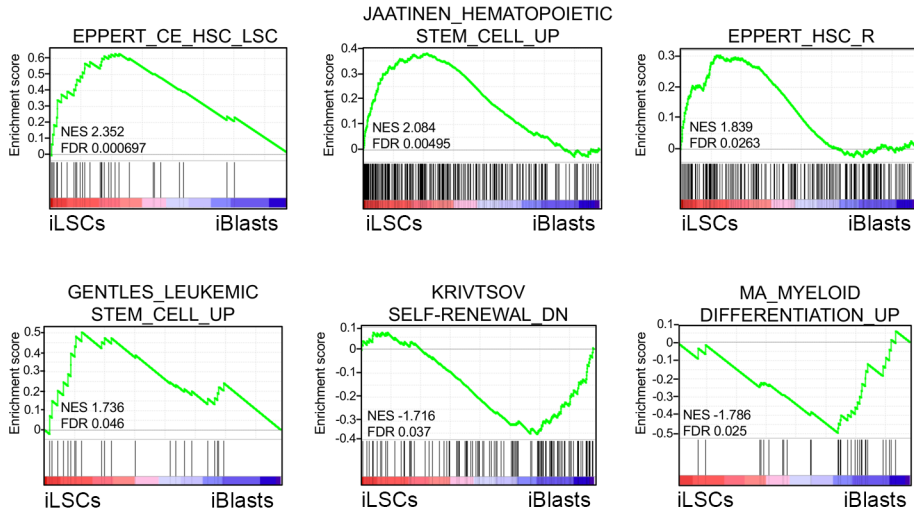**C**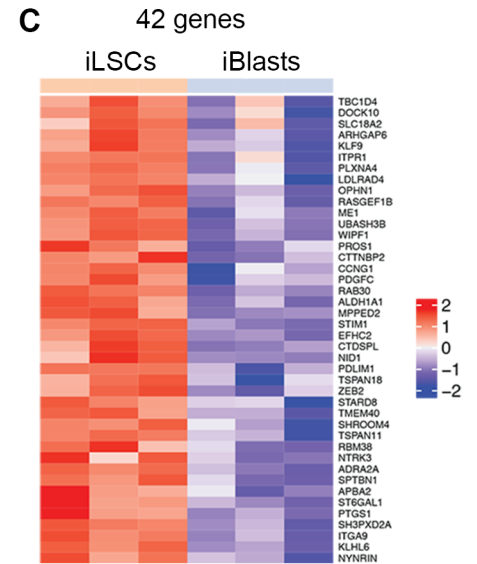**B**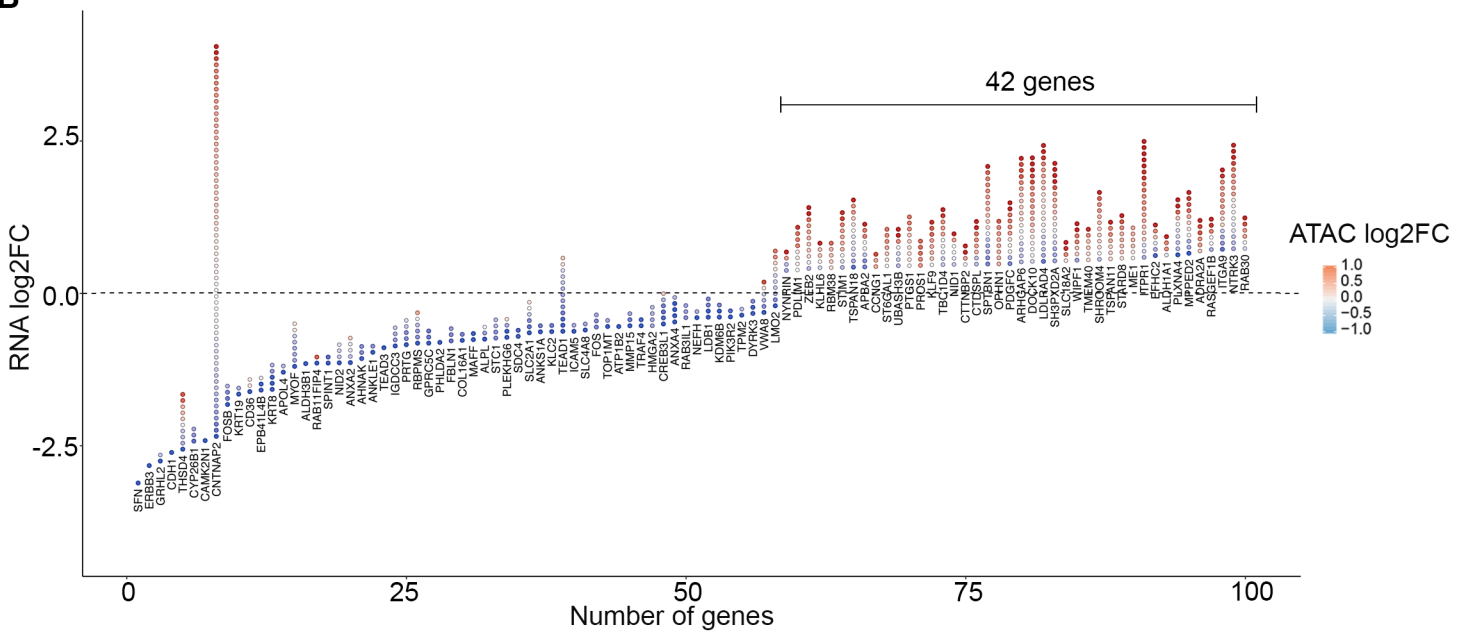

**Figure S5. Transcriptome and chromatin accessibility analyses (related to Figure 5).**

(A) GSEA plots of the indicated gene sets against the rank list of differentially accessible genes in iLSCs and iBlasts, showing enrichment of HSC and LSC transcriptional programs in iLSCs. (B) Fold change ( $\log_2FC$ ) of gene expression and accessibility in iLSCs vs iBlasts. 58 genes have decreased expression and decreased accessibility (left) and 42 genes have increased expression and increased accessibility (right) in iLSCs vs iBlasts. For each gene, the position of the gene symbol in the y axis indicates the expression change. All peaks belonging to a gene are shown as circles stacked on top of the gene symbol. The color of the circles indicates the accessibility  $\log_2FC$  of each peak. (C) Heatmap of gene expression of the 42 genes (from Figure 5G) in iLSCs and iBlasts.

**A**

| iLSCs |       |                            |         | iBlasts |       |                             |         |
|-------|-------|----------------------------|---------|---------|-------|-----------------------------|---------|
| Rank  | Motif | Name                       | p-value | Rank    | Motif | Name                        | p-value |
| 1     |       | ERG (VCaP-ERG-ChiP)        | 1e-35   | 1       |       | NFY                         | 1e-15   |
| 2     |       | RUNX-AML (CD4+-PolII-ChiP) | 1e-30   | 2       |       | KLF3 (MEF-KLF3-ChiP)        | 1e-6    |
| 3     |       | RUNX (HPC7-RUNX1-ChiP)     | 1e-29   | 3       |       | KLF9 (GBM-KLF9-ChiP)        | 1e-6    |
| 4     |       | ETV1 (GIST48-ETV1-ChiP)    | 1e-27   | 4       |       | KLF6 (PDAC-KLF6-ChiP)       | 1e-6    |
| 5     |       | RUNX2 (PCa-RUNX2-ChiP)     | 1e-27   | 5       |       | Spl                         | 1e-5    |
| 6     |       | RUNX1 (Jurkat-RUNX)        | 1e-26   | 6       |       | Maz (HepG2-Maz-ChiP)        | 1e-4    |
| 7     |       | ETS1 (Jurkat-ETS1-ChiP)    | 1e-22   | 7       |       | Hand2 (Mesoderm-Hand2-ChiP) | 1e-4    |
| 8     |       | Fli1 (CD8-FLI-ChiP)        | 1e-19   | 8       |       | Slug (Mesoderm-Snai2-ChiP)  | 1e-4    |
| 9     |       | ETV2 (ES-ER71-ChiP)        | 1e-19   | 9       |       | E-box                       | 1e-4    |
| 10    |       | EHF (LoVo-EHF-ChiP)        | 1e-17   | 10      |       | KLF5 (LoVo-KLF5-ChiP)       | 1e-4    |

**B**

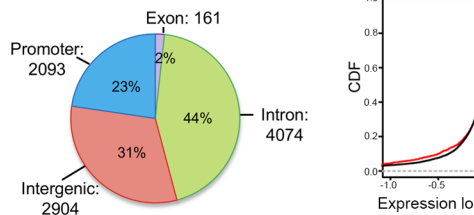

**C**

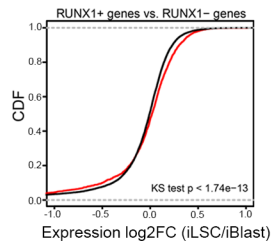

**D**

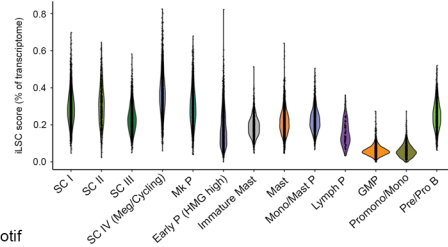

■ 2198 genes within 50kb of RUNX1 motif  
 ■ Other genes

**E**

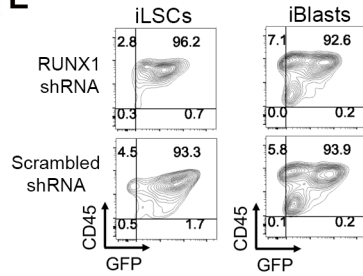

**F**

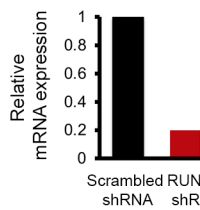

**G**

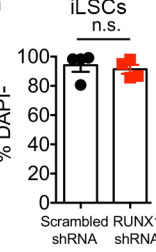

**H**

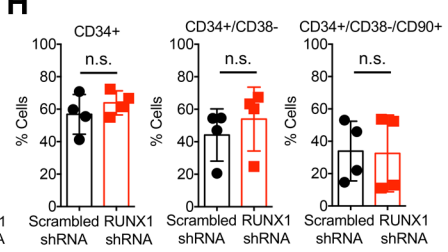

**I**

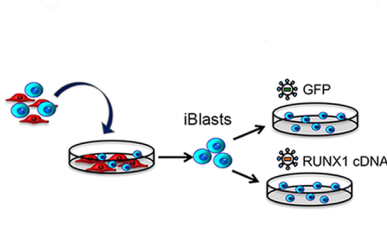

**J**

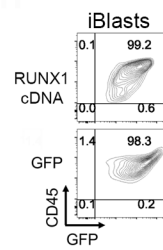

**K**

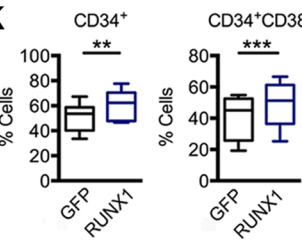

**L**

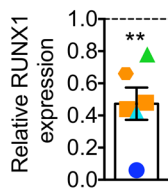

**M**

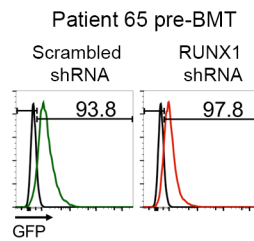

**N**

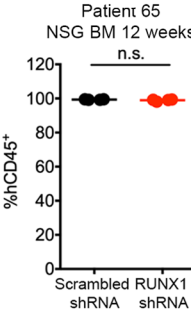

**O**

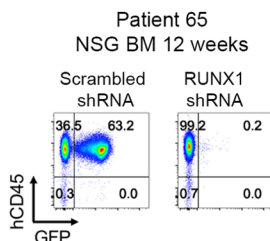



**Figure S6. Role of RUNX1 in LSC maintenance (related to Figure 6).**

(A) Top enriched motifs in peaks with significantly increased accessibility in iLSCs (left) and in peaks with significantly increased accessibility in iBlasts (right). (B) Genomic annotation of all ATAC-seq peaks containing RUNX1 motifs. (C) Cumulative distribution functions (CDF) plot of the expression change ( $\log_2FC$ ) of genes within 50 kb of a RUNX1 motif (red) and of all other genes (black), showing higher expression of RUNX1-associated genes in iLSCs. (D) Violin plots showing the iLSC score (determined by the expression levels of the 42 genes from Figure 5G) of each scRNAseq cluster. (E) Assessment of transduction efficiency (GFP<sup>+</sup> cells) in iLSCs (left) and iBlasts (right) 48 hours after lentiviral transduction with a lentiviral vector encoding RUNX1 or scrambled shRNA. (F) Relative RUNX1 mRNA expression in iLSCs transduced with lentiviral vectors encoding RUNX1 or scrambled shRNA 48 hours after transduction. (G) Cell viability of iLSCs measured by DAPI staining 7 days after transduction with lentiviral vectors encoding RUNX1 or scrambled shRNA. Mean and SEM of 4 independent experiments are shown. (H) Immunophenotype of iLSCs 7 days after transduction with lentiviral vectors encoding RUNX1 or scrambled shRNA. Mean and SEM of 4 independent experiments are shown. (I) Separated iBlasts were transduced with a lentiviral vector encoding GFP or RUNX1 cDNA. (J) Assessment of transduction efficiency (GFP<sup>+</sup> cells) of iBlasts 48 hours after transduction with lentiviral vectors encoding GFP or RUNX1 cDNA. (K) Immunophenotype of iBlasts transduced with a lentiviral vector encoding GFP or RUNX1. Mean and SEM of 7 independent experiments are shown. \*\* $p < 0.001$ , \*\*\* $p < 0.001$ , t test. (L) RUNX1 mRNA expression in 6 primary AML samples after RUNX1 shRNA KD, relative to RUNX1 expression in the same samples after scrambled shRNA transduction. Mean and SEM are shown. \*\* $p < 0.01$ , t test. (M) Assessment of transduction efficiency of primary AML patient cells (Patient 65) 48 hours after transduction with RUNX1 shRNA or scrambled shRNA. (N) Engraftment levels of AML Patient 65 cells transduced with RUNX1 or scrambled shRNA in the BM of mice 12 weeks after transplantation. Each data point represents a unique mouse. Mean and SEM are shown. (O) Representative flow cytometry panels showing human cell engraftment and engraftment of GFP<sup>+</sup> cells in the BM of recipient mice 12 weeks post-transplantation with AML Patient 65 cells transduced with RUNX1 shRNA or scrambled shRNA.

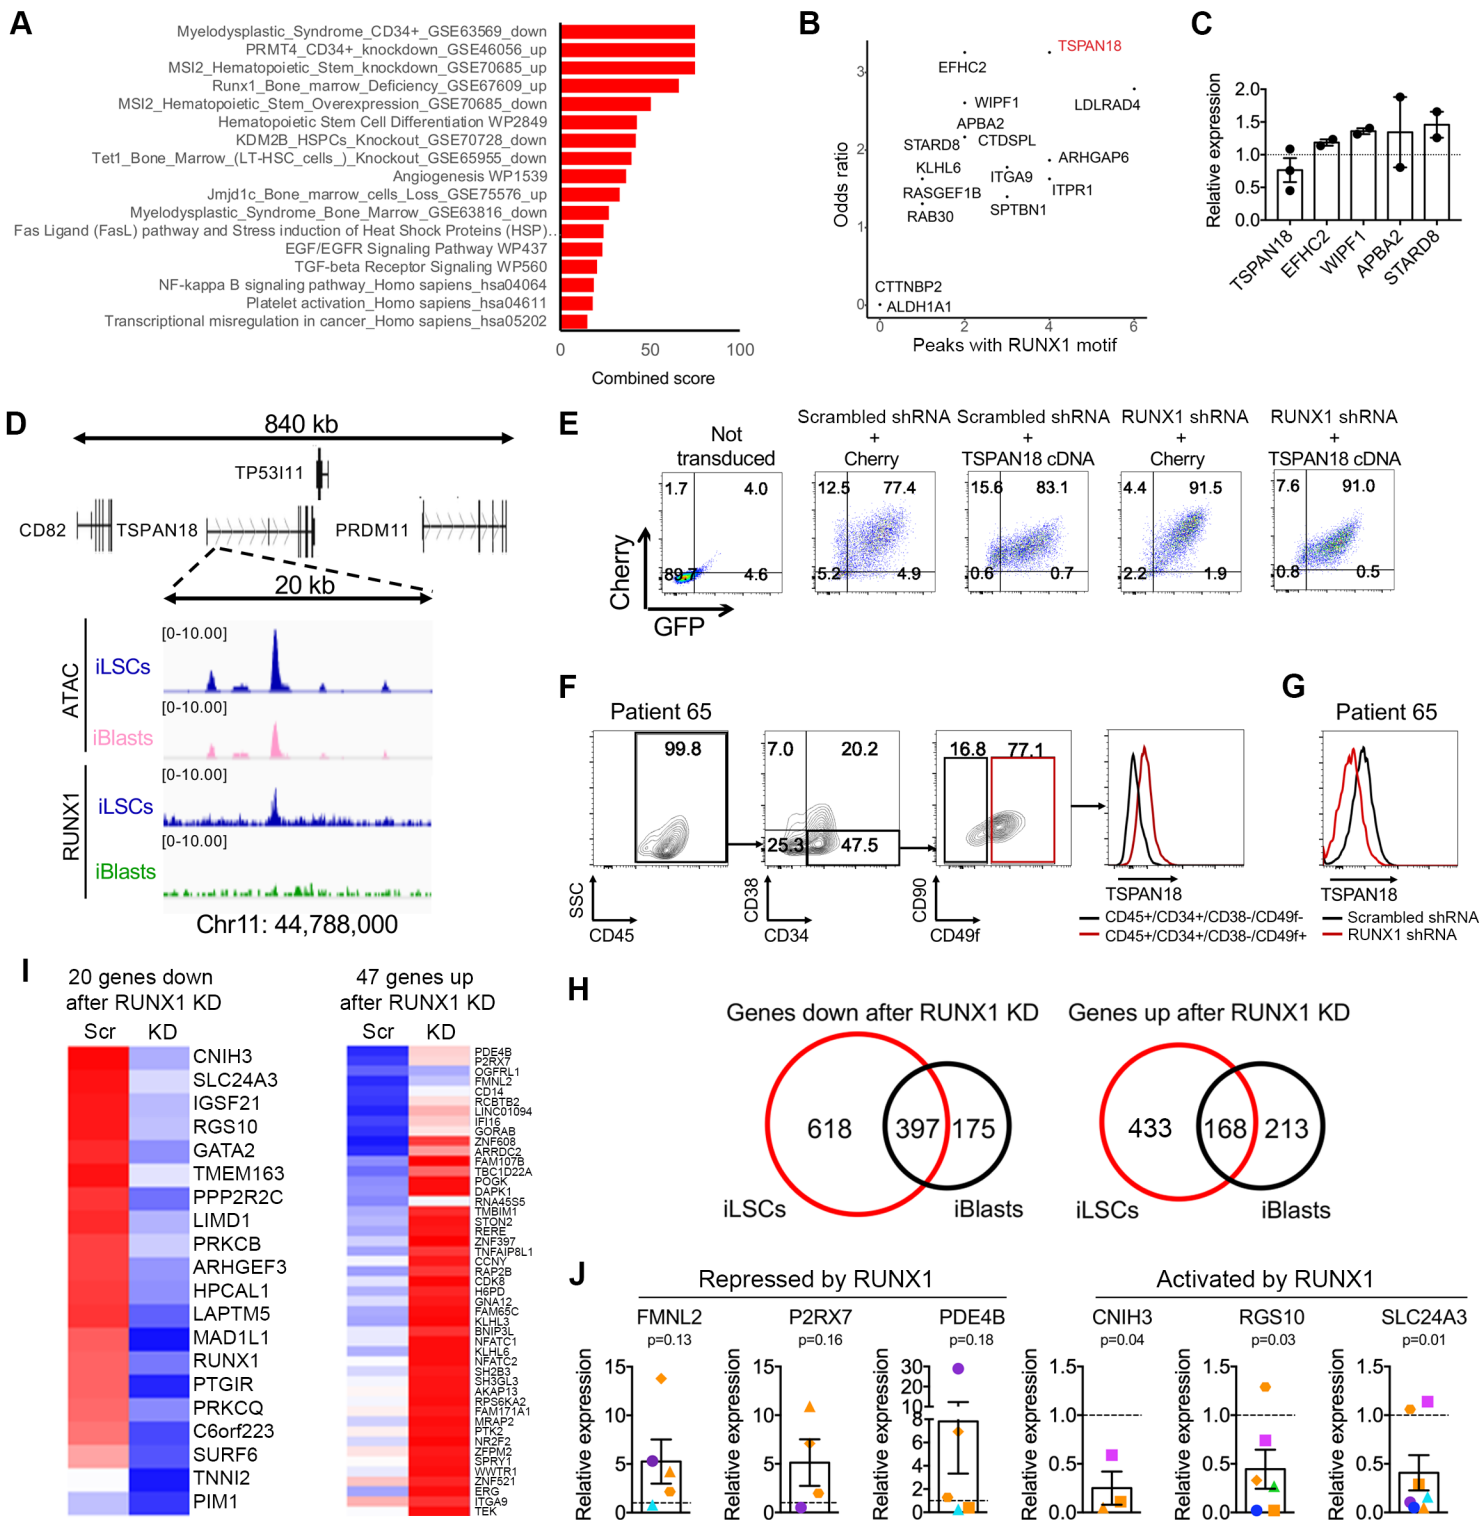

**Figure S7. RUNX1 regulation of iLSCs (related to Figure 7).**

(A) Pathway enrichment analysis using genes that are preferentially bound by RUNX1 in iLSCs vs iBlasts. (B) RUNX1 motif enrichment in accessible chromatin peaks linked to the 16 genes from Figure 7C (those among the 42 gene set that were bound by RUNX1 preferentially in iLSCs than in iBlasts). The number of accessible peaks containing RUNX1 motifs for each gene is shown in the x axis. The y axis indicates RUNX1 motif enrichment for the peaks associated with the 16 genes compared to background (atlas), measured as odds ratio. (C) Expression of the indicated genes (top 5 predicted RUNX1 targets) in iLSCs transduced with RUNX1 shRNA relative to scrambled shRNA. Mean and SEM of 2-3 independent experiments are shown. (D) Genome tracks showing ATAC-seq and RUNX1 binding (CHIP-seq) peaks within intron 1 of TSPAN18 in iLSCs and iBlasts. (E) Transduction efficiency 48 hours after transduction with a GFP lentiviral vector encoding RUNX1 or scrambled shRNA and a Cherry lentiviral vector encoding mCherry or mCherry and TSPAN18 cDNA. (F) TSPAN18 expression in LSC-enriched CD45+/CD34+/CD38-/CD49f+ compared to CD45+/CD34+/CD38-/CD49f- cells from Patient 65. (G) Decrease in TSPAN18 expression after RUNX1 KD in Patient 65 cells. (Histograms are gated on GFP+ cells.) (H) Venn diagrams of DEGs after RUNX1 KD in iLSCs and iBlasts. (I) Heatmaps showing expression of the 20 and 47 genes from Figure 7E (Scr: scrambled shRNA; KD: RUNX1 KD). (J) Expression of 3 of the top RUNX1-activated and 3 of the top RUNX1-repressed genes after RUNX1 KD in primary AML patient cells relative to scrambled shRNA (each point represents one patient sample from Figure 6L). Mean and SEM are shown.

Table S1. Calculation of proliferation and transition rates (related to Figure 3).

| AML-4.10                                                  |        |        |        |        |        |  |
|-----------------------------------------------------------|--------|--------|--------|--------|--------|--|
| Proliferation rate iLSCs (P)=Log[(iLSCd3/iLSCd0)/3]       |        |        |        |        |        |  |
|                                                           | Day 21 | Day 24 | Day 27 | Day 30 | Day 33 |  |
| Experiment 1                                              | 0.31   | 0.33   | 0.28   | 0.26   | 0.30   |  |
| Experiment 2                                              | 0.69   | 0.45   | 0.27   | 0.30   | 0.22   |  |
| Experiment 3                                              | 0.55   | 0.58   | 0.49   | 0.28   | 0.20   |  |
| Mean                                                      | 0.52   | 0.45   | 0.35   | 0.28   | 0.24   |  |
| SEM                                                       | 0.11   | 0.07   | 0.07   | 0.01   | 0.03   |  |
| Mean (all experiments)                                    | 0.37   |        |        |        |        |  |
| SEM (all experiments)                                     | 0.04   |        |        |        |        |  |
| Proliferation rate iBlasts (P)=Log[(iBlastd3/iBlastd0)/3] |        |        |        |        |        |  |
|                                                           | Day 21 | Day 24 | Day 27 | Day 30 | Day 33 |  |
| Experiment 1                                              | 0.29   | 0.10   | 0.41   | 0.37   | 0.28   |  |
| Experiment 2                                              | 0.57   | 0.44   | 0.33   | 0.56   | 0.40   |  |
| Experiment 3                                              | 0.44   | 0.23   | 0.23   | 0.37   | 0.17   |  |
| Average                                                   | 0.43   | 0.26   | 0.32   | 0.43   | 0.28   |  |
| SEM                                                       | 0.08   | 0.10   | 0.05   | 0.06   | 0.07   |  |
| Mean (all experiments)                                    | 0.35   |        |        |        |        |  |
| SEM (all experiments)                                     | 0.03   |        |        |        |        |  |

| AML-4.24                                                  |        |        |        |        |        |  |
|-----------------------------------------------------------|--------|--------|--------|--------|--------|--|
| Proliferation rate iLSCs (P)=Log[(iLSCd3/iLSCd0)/3]       |        |        |        |        |        |  |
|                                                           | Day 21 | Day 24 | Day 27 | Day 30 | Day 33 |  |
| Experiment 1                                              | 0.69   | 0.55   | 0.18   | 0.21   | 0.18   |  |
| Experiment 2                                              | 0.25   | 0.34   | 0.25   | 0.14   | 0.09   |  |
| Experiment 3                                              | 0.35   | 0.30   | 0.18   | 0.21   | 0.18   |  |
| Average                                                   | 0.43   | 0.40   | 0.21   | 0.19   | 0.15   |  |
| SEM                                                       | 0.13   | 0.08   | 0.02   | 0.02   | 0.03   |  |
| Mean (all experiments)                                    | 0.27   |        |        |        |        |  |
| SEM (all experiments)                                     | 0.06   |        |        |        |        |  |
| Proliferation rate iBlasts (P)=Log[(iBlastd3/iBlastd0)/3] |        |        |        |        |        |  |
|                                                           | Day 21 | Day 24 | Day 27 | Day 30 | Day 33 |  |
| Experiment 1                                              | 0.35   | 0.42   | 0.52   | 0.14   | 0.18   |  |
| Experiment 2                                              | 0.09   | 0.14   | 0.23   | 0.18   | 0.17   |  |
| Experiment 3                                              | 0.50   | 0.32   | 0.37   | 0.11   | 0.12   |  |
| Average                                                   | 0.31   | 0.30   | 0.37   | 0.14   | 0.15   |  |
| SEM                                                       | 0.12   | 0.06   | 0.05   | 0.02   | 0.02   |  |
| Mean (all experiments)                                    | 0.26   |        |        |        |        |  |
| SEM (all experiments)                                     | 0.04   |        |        |        |        |  |

| AML-4.10                                        |        |        |        |        |        |  |
|-------------------------------------------------|--------|--------|--------|--------|--------|--|
| Transition rate iLSCs (T)=(iBlastd3/iLSCd3)/3   |        |        |        |        |        |  |
|                                                 | Day 21 | Day 24 | Day 27 | Day 30 | Day 33 |  |
| Experiment 1                                    | 0.26   | 0.25   | 0.21   | 0.20   | 0.19   |  |
| Experiment 2                                    | 0.12   | 0.15   | 0.13   | 0.10   | 0.11   |  |
| Experiment 3                                    | 0.26   | 0.34   | 0.19   | 0.37   | 0.21   |  |
| Average                                         | 0.21   | 0.24   | 0.18   | 0.22   | 0.17   |  |
| SEM                                             | 0.05   | 0.06   | 0.03   | 0.08   | 0.03   |  |
| Mean (all experiments)                          | 0.21   |        |        |        |        |  |
| SEM (all experiments)                           | 0.02   |        |        |        |        |  |
| Transition rate iBlasts (T)=(iLSCd3/iBlastd3)/3 |        |        |        |        |        |  |
|                                                 | Day 21 | Day 24 | Day 27 | Day 30 | Day 33 |  |
| Experiment 1                                    | 0.11   | 0.22   | 0.07   | 0.04   | 0.04   |  |
| Experiment 2                                    | 0.23   | 0.10   | 0.07   | 0.02   | 0.02   |  |
| Experiment 3                                    | 0.14   | 0.09   | 0.09   | 0.06   | 0.03   |  |
| Average                                         | 0.16   | 0.14   | 0.08   | 0.04   | 0.03   |  |
| SEM                                             | 0.04   | 0.04   | 0.01   | 0.01   | 0.00   |  |
| Mean (all experiments)                          | 0.09   |        |        |        |        |  |
| SEM (all experiments)                           | 0.02   |        |        |        |        |  |

| AML-4.24                                        |        |        |        |        |        |  |
|-------------------------------------------------|--------|--------|--------|--------|--------|--|
| Transition rate iLSCs (T)=(iBlastd3/iLSCd3)/3   |        |        |        |        |        |  |
|                                                 | Day 21 | Day 24 | Day 27 | Day 30 | Day 33 |  |
| Experiment 1                                    | 0.14   | 0.19   | 0.07   | 0.07   | 0.07   |  |
| Experiment 2                                    | 0.35   | 0.22   | 0.15   | 0.20   | 0.21   |  |
| Experiment 3                                    | 0.24   | 0.07   | 0.09   | 0.10   | 0.16   |  |
| Average                                         | 0.24   | 0.16   | 0.10   | 0.12   | 0.15   |  |
| SEM                                             | 0.06   | 0.05   | 0.02   | 0.04   | 0.04   |  |
| Mean (all experiments)                          | 0.16   |        |        |        |        |  |
| SEM (all experiments)                           | 0.02   |        |        |        |        |  |
| Transition rate iBlasts (T)=(iLSCd3/iBlastd3)/3 |        |        |        |        |        |  |
|                                                 | Day 21 | Day 24 | Day 27 | Day 30 | Day 33 |  |
| Experiment 1                                    | 0.12   | 0.20   | 0.06   | 0.11   | 0.04   |  |
| Experiment 2                                    | 0.06   | 0.02   | 0.06   | 0.08   | 0.02   |  |
| Experiment 3                                    | 0.40   | 0.05   | 0.05   | 0.06   | 0.06   |  |
| Average                                         | 0.20   | 0.09   | 0.06   | 0.08   | 0.04   |  |
| SEM                                             | 0.10   | 0.02   | 0.00   | 0.01   | 0.01   |  |
| Mean (all experiments)                          | 0.09   |        |        |        |        |  |
| SEM (all experiments)                           | 0.03   |        |        |        |        |  |

Table S2. Results of single GFP+ iLSC plating experiment (related to Figure 3).

| Well    | Population | Total cell number | %GFP <sup>+</sup> | Calculated number of GFP <sup>+</sup> cells | iBlast/iLSC ratio |
|---------|------------|-------------------|-------------------|---------------------------------------------|-------------------|
| 1       | iLSC       | 16875             | 4.4               | 743                                         | 4.90              |
|         | iBlast     | 27563             | 13.2              | 3638                                        |                   |
| 2       | iLSC       | 29250             | 0.51              | 149                                         | 0.68              |
|         | iBlast     | 42188             | 0.24              | 101                                         |                   |
| 3       | iLSC       | 30750             | 0.073             | 22                                          | N/A               |
|         | iBlast     | 103500            | 0                 | 0                                           |                   |
| 4       | iLSC       | 17250             | 0.15              | 26                                          | 8.24              |
|         | iBlast     | 193875            | 0.11              | 213                                         |                   |
| 5       | iLSC       | 58500             | 0.93              | 544                                         | 0.06              |
|         | iBlast     | 25875             | 0.12              | 31                                          |                   |
| 6       | iLSC       | 17500             | 0.49              | 86                                          | N/A               |
|         | iBlast     | 36000             | 0                 | 0                                           |                   |
| 7       | iLSC       | 21000             | 0                 | 0                                           | N/A               |
|         | iBlast     | 27000             | 0.37              | 100                                         |                   |
| 21      | iLSC       | 10875             | 3.28              | 357                                         | 0.39              |
|         | iBlast     | 140600            | 0.1               | 141                                         |                   |
| 22      | iLSC       | 27750             | 0.84              | 233                                         | 0.08              |
|         | iBlast     | 3938              | 0.45              | 18                                          |                   |
| 23      | iLSC       | 17625             | 0.43              | 76                                          | 1.12              |
|         | iBlast     | 8438              | 1.01              | 85                                          |                   |
| 24      | iLSC       | 79500             | 0.47              | 374                                         | 0.15              |
|         | iBlast     | 111000            | 0.051             | 57                                          |                   |
| 25      | iLSC       | 11875             | 0.56              | 67                                          | 0.90              |
|         | iBlast     | 45850             | 0.13              | 60                                          |                   |
| 26      | iLSC       | 20000             | 0.53              | 106                                         | 2.71              |
|         | iBlast     | 220750            | 0.13              | 287                                         |                   |
| 50      | iLSC       | 6275              | 0.61              | 38                                          | 3.57              |
|         | iBlast     | 85500             | 0.16              | 137                                         |                   |
| 51      | iLSC       | 10625             | 1.06              | 113                                         | 0.31              |
|         | iBlast     | 31625             | 0.11              | 35                                          |                   |
| 52      | iLSC       | 11250             | 0.76              | 86                                          | 1.04              |
|         | iBlast     | 24750             | 0.36              | 89                                          |                   |
| 57      | iLSC       | 20250             | 3.41              | 691                                         | 1.21              |
|         | iBlast     | 20250             | 4.11              | 832                                         |                   |
| 58      | iLSC       | 9000              | 3.03              | 273                                         | 34.34             |
|         | iBlast     | 211380            | 4.43              | 9364                                        |                   |
| 60      | iLSC       | 20000             | 0.33              | 66                                          | 2.94              |
|         | iBlast     | 176500            | 0.11              | 194                                         |                   |
| 63      | iLSC       | 9000              | 2.19              | 197                                         | 0.88              |
|         | iBlast     | 14063             | 1.23              | 173                                         |                   |
| 85      | iLSC       | 6000              | 3.71              | 223                                         | 2.42              |
|         | iBlast     | 19263             | 2.8               | 539                                         |                   |
| 87      | iLSC       | 19875             | 0.59              | 117                                         | 0.73              |
|         | iBlast     | 25875             | 0.33              | 85                                          |                   |
| 88      | iLSC       | 5250              | 0.72              | 38                                          | 0.44              |
|         | iBlast     | 27063             | 0.062             | 17                                          |                   |
| 90      | iLSC       | 9750              | 0.48              | 47                                          | 2.56              |
|         | iBlast     | 29250             | 0.41              | 120                                         |                   |
| 91      | iLSC       | 20475             | 1.16              | 238                                         | 4.88              |
|         | iBlast     | 144875            | 0.8               | 1159                                        |                   |
| 94      | iLSC       | 19875             | 0.59              | 117                                         | 0.87              |
|         | iBlast     | 23063             | 0.44              | 101                                         |                   |
| Average |            |                   |                   |                                             | 3.28              |

Table S3. The 42 genes ranked by the p value of their expression difference between LSC+ and LSC- primary AML cell fractions (related to Figure 5).

| RANK | SYMBOL   | GENE NAME                                                    | RNA-seq            |             | ATAC-seq info for most significant nearby peak |            |                          |                    | Gene level accessibility test |              | Association with LSC <sup>+</sup> fraction of Ng et al. |             |
|------|----------|--------------------------------------------------------------|--------------------|-------------|------------------------------------------------|------------|--------------------------|--------------------|-------------------------------|--------------|---------------------------------------------------------|-------------|
|      |          |                                                              | log2FC_iLSC/iBlast | padj        | Region                                         | Annotation | Distance to nearest peak | log2FC_iLSC/iBlast | padj                          | KS.statistic | KS.p-value                                              | p-value     |
| 1    | NYNRIN   | NYN domain and retroviral integrase containing               | 0.269837091        | 0.047722148 | chr14:24858365-24858779                        | intergenic | 9212                     | 1.071981227        | 0.003944795                   | 0.336788625  | 0.754690637                                             | 9.66E-13    |
| 2    | ITPR1    | inositol 1,4,5-trisphosphate receptor type 1                 | 0.002690283        | 0.485121506 | chr3:4778189-4778618                           | intron     | 0                        | 1.27779172         | 0.000148325                   | 0.54201995   | 1.58E-05                                                | 8.06E-09    |
| 3    | EFHC2    | EF-hand domain containing 2                                  | 0.514754463        | 4.87E-05    | chrX:44053980-44054613                         | intron     | 0                        | 1.679600523        | 1.42E-05                      | 0.225263955  | 0.92104745                                              | 8.66E-08    |
| 4    | PDLIM1   | PDZ and LIM domain 1                                         | 0.275524586        | 0.02829767  | chr10:97057039-97057726                        | intergenic | 6133                     | 0.950032778        | 2.08E-05                      | 0.530353221  | 0.022242124                                             | 9.52E-06    |
| 5    | KLHL6    | kelch like family member 6                                   | 0.313918314        | 0.008791974 | chr3:183230965-183231436                       | intron     | 0                        | 1.27219586         | 0.025894609                   | 0.362117095  | 0.528475257                                             | 1.40E-05    |
| 6    | UBASH3B  | ubiquitin associated and SH3 domain containing B             | 0.346093337        | 0.002144685 | chr1:1122551722-122552354                      | intron     | 0                        | 1.341690612        | 0.053323908                   | 0.306134982  | 0.528115579                                             | 6.23E-05    |
| 7    | CTDSP1   | CTD small phosphatase like                                   | 0.371042753        | 0.001669566 | chr3:37941421-37941893                         | intron     | 0                        | 1.117506995        | 0.012421706                   | 0.523346485  | 0.02501031                                              | 0.000492908 |
| 8    | ALDH1A1  | aldehyde dehydrogenase 1 family member A1                    | 0.522411131        | 0.000106981 | chr9:75612172-75613057                         | intergenic | 43938                    | 1.032313231        | 4.56E-07                      | 0.625162839  | 0.08774388                                              | 0.001052108 |
| 9    | SPB1     | spectrin beta, non-erythrocytic 1                            | 0.374561255        | 0.001669566 | chr2:54656904-54657770                         | intergenic | 25683                    | 1.163796474        | 1.48E-07                      | 0.289430068  | 0.115982128                                             | 0.001375011 |
| 10   | PDGFC    | platelet derived growth factor C                             | 0.380170761        | 0.018811367 | chr4:157936273-157936855                       | intergenic | 43726                    | 1.312182605        | 1.12E-06                      | 0.393502336  | 0.066353261                                             | 0.001557831 |
| 11   | ITGA9    | integrin subunit alpha 9                                     | 0.617715046        | 5.14E-07    | chr3:37495558-37495808                         | promoter   | 0                        | 1.158265039        | 0.033300616                   | 0.379190616  | 0.035728574                                             | 0.004015694 |
| 12   | STAR8A   | SIAR related lipid transfer domain containing 8              | 0.469910775        | 0.005215844 | chrX:67920012-67920619                         | intron     | 0                        | 1.208356949        | 0.000276246                   | 0.621357055  | 0.004155649                                             | 0.02483754  |
| 13   | CCNG1    | cyclin G1                                                    | 0.333401453        | 0.016386577 | chr5:162853036-162853696                       | intergenic | 10880                    | 0.862620139        | 0.000283237                   | 0.798898277  | 0.043452798                                             | 0.027691092 |
| 14   | SH3PX2A  | SH3 and PX domains 2A                                        | 0.426644825        | 0.000190083 | chr10:105456141-105456790                      | intron     | 0                        | 1.541326307        | 0.000618239                   | 0.271158145  | 0.164223658                                             | 0.040395172 |
| 15   | LDLRAD4  | low density lipoprotein receptor class A domain containing 4 | 0.418492757        | 0.011488487 | chr18:13394798-13395445                        | intron     | 0                        | 1.039248607        | 0.004507902                   | 0.295209737  | 0.061326931                                             | 0.041302378 |
| 16   | NTRK3    | neurotrophic receptor tyrosine kinase 3                      | 0.624503373        | 0.000781351 | chr15:88554627-88555354                        | intron     | 0                        | 1.203962862        | 1.50E-07                      | 0.325138646  | 0.04541478                                              | 0.048749139 |
| 17   | ME1      | malic enzyme 1                                               | 0.470338532        | 0.000574712 | chr6:84127694-84127914                         | intron     | 0                        | 0.399032509        | 0.728661701                   | 0.560613392  | 0.04605622                                              | 0.071093919 |
| 18   | SLC18A2  | solute carrier family 18 member A2                           | 0.429672631        | 0.037421185 | chr10:118986252-118986823                      | intergenic | 13760                    | 1.371486668        | 0.003792098                   | 0.635230952  | 0.079275851                                             | 0.124447209 |
| 19   | TSPAN18  | tetraspanin 18                                               | 0.324168801        | 0.0323228   | chr11:44938174-44938803                        | intron     | 0                        | 1.18503913         | 0.000740681                   | 0.18099031   | 0.826781879                                             | 0.16917825  |
| 20   | PTGS1    | prostaglandin-endoperoxide synthase 1                        | 0.347381922        | 0.005375141 | chr9:125117086-125117383                       | intergenic | 15425                    | 0.641227224        | 0.486779813                   | 0.49905088   | 0.022617404                                             | 0.207064001 |
| 21   | MPPE2    | metallophosphoesterase domain containing 2                   | 0.550514783        | 0.018058601 | chr11:30413810-30415294                        | intron     | 0                        | 1.098894028        | 1.41E-08                      | 0.296484027  | 0.288442927                                             | 0.28485056  |
| 22   | APBA2    | amyloid beta precursor protein binding family A member 2     | 0.327914091        | 0.047564337 | chr15:29247988-29248485                        | intron     | 0                        | 1.341572602        | 0.004067932                   | 0.281911825  | 0.048529069                                             | 0.47895072  |
| 23   | TSPAN11  | tetraspanin 11                                               | 0.459375358        | 0.011300692 | chr12:31035623-31035948                        | intergenic | 43889                    | 1.163671721        | 0.089404314                   | 0.657628317  | 0.00469755                                              | 0.512798407 |
| 24   | ADRA2A   | adrenoceptor alpha 2A                                        | 0.588097229        | 5.31E-07    | chr10:112886735-112887580                      | intergenic | 46072                    | 0.995977458        | 5.88E-06                      | 0.701343656  | 0.005488282                                             | 0.569429703 |
| 25   | CTTNBP2  | cortactin binding protein 2                                  | 0.368548889        | 0.003687469 | chr7:117371397-117372015                       | intron     | 0                        | 1.240097254        | 1.66E-05                      | 0.570597759  | 0.147826242                                             | 0.654103061 |
| 26   | PROS1    | protein S                                                    | 0.350339943        | 0.008295636 | chr3:93688973-93689187                         | intron     | 0                        | 0.732685285        | 0.092206562                   | 0.853035322  | 0.001383874                                             | 0.710124506 |
| 27   | PLXNA4   | plexin A4                                                    | 0.526968714        | 0.000277715 | chr7:132174468-132174980                       | intron     | 0                        | 1.047955065        | 0.000726888                   | 0.234510738  | 0.64145773                                              | 0.725855323 |
| 28   | TMEM40   | transmembrane protein 40                                     | 0.44410652         | 0.01675798  | chr3:12747907-12748284                         | intergenic | 26744                    | 0.974009086        | 0.068353044                   | 0.639278669  | 0.014839952                                             | 0.810232133 |
| 29   | RASGEF1B | RasGEF domain family member 1B                               | 0.611687448        | 0.000510453 | chr4:82425816-82426851                         | intergenic | 32833                    | 1.027608696        | 6.18E-05                      | 0.399914393  | 0.262814249                                             | 0.8135817   |
| 30   | STGAL1   | ST6 beta-galactoside alpha-2,6-sialyltransferase 1           | 0.344246093        | 0.00885572  | chr3:186670735-186671280                       | intron     | 0                        | 0.866112724        | 0.347024083                   | 0.543473406  | 0.032019662                                             | 0.84894965  |
| 31   | OPHN1    | oligophrenin 1                                               | 0.375041542        | 0.016341173 | chrX:67472414-67472875                         | intron     | 0                        | 0.786224689        | 0.031993949                   | 0.773960621  | 0.000137806                                             | 0.849817342 |
| 32   | TBC1D4   | TBC1 domain family member 4                                  | 0.365831283        | 0.04401767  | chr13:75932122-75932445                        | intron     | 0                        | 1.245617357        | 0.019839369                   | 0.311422935  | 0.286774179                                             | 0.930440229 |
| 33   | STIM1    | stromal interaction molecule 1                               | 0.318437002        | 0.004157082 | chr11:3887520-3887785                          | intron     | 0                        | 0.965467944        | 0.198381326                   | 0.458551383  | 0.029853265                                             | 0.947032772 |
| 34   | ARHGAP6  | Rho GTPase activating protein 6                              | 0.410007023        | 0.001553048 | chrX:14441491-14441965                         | intron     | 0                        | 1.216119477        | 8.69E-05                      | 0.303236519  | 0.073088881                                             | 0.959153268 |
| 35   | SHROOM4  | shroom family member 4                                       | 0.450906313        | 0.002884118 | chrX:50386273-50387140                         | intron     | 0                        | 1.004902976        | 1.21E-05                      | 0.468983015  | 0.10210323                                              | 0.98354668  |
| 36   | NID1     | nidogen 1                                                    | 0.368437132        | 0.002252456 | chr1:23610235-236101143                        | intergenic | 37988                    | 1.029248426        | 9.64E-06                      | 0.317378196  | 0.581359817                                             | 0.98663046  |
| 37   | WIPF1    | WAS/WASL interacting protein family member 1                 | 0.438801481        | 6.37E-05    | chr2:175462344-175462653                       | intron     | 0                        | 1.50721629         | 0.038186494                   | 0.558840107  | 0.025260407                                             | 0.996223768 |
| 38   | KLIF9    | Kruppel like factor 9                                        | 0.362089599        | 0.013379328 | chr9:73053217-73054038                         | intergenic | 23643                    | 0.962987877        | 0.000230972                   | 0.597484833  | 0.006618989                                             | 0.999650241 |
| 39   | ZEB2     | zinc finger E-box binding homeobox 2                         | 0.301616132        | 0.016971491 | chr2:145192386-145192615                       | intron     | 0                        | 1.882309563        | 0.151941563                   | 0.48115126   | 0.012290184                                             | 0.999948734 |
| 40   | RAB30    | RAB30, member RAS oncogene family                            | 0.629322369        | 9.90E-07    | chr11:82765005-82765578                        | intron     | 0                        | 1.162852947        | 3.74E-06                      | 0.491935584  | 0.109623799                                             | 0.999993516 |
| 41   | RBM38    | RNA binding motif protein 38                                 | 0.31630118         | 0.022632928 | chr20:56025539-56025843                        | intergenic | 41152                    | 0.718961073        | 0.163348167                   | 0.649049019  | 0.029625778                                             | 0.999999399 |
| 42   | DOCK10   | dedicator of cytokinesis 10                                  | 0.418400944        | 0.018909882 | chr2:225813418-225814067                       | promoter   | 0                        | 1.27950519         | 2.01E-07                      | 0.455033643  | 0.001161133                                             | 0.99999992  |

Table S4. TF “regulons” that correlate with the iLSC score (related to Figure 6).

| Regulon        | Variance   | Number of genes | Variance by cluster | iLSC score pearson correlation | Pearson_pval | iLSC score spearman correlation | Spearman_pval | Slope      |
|----------------|------------|-----------------|---------------------|--------------------------------|--------------|---------------------------------|---------------|------------|
| TAL1           | 0.04331244 | 76              | 31.2880242          | 0.716213884                    | 0            | 0.726970406                     | 0             | 128.21012  |
| LMO2           | 0.03361308 | 51              | 24.0524975          | 0.692222163                    | 0            | 0.685683366                     | 0             | 109.162354 |
| NFIB           | 0.03791132 | 21              | 27.2589038          | 0.667153363                    | 0            | 0.672631622                     | 0             | 111.733505 |
| GATA5          | 0.02890615 | 23              | 20.5412291          | 0.663859067                    | 0            | 0.663715993                     | 0             | 97.0832512 |
| MEIS1          | 0.04627962 | 16              | 33.5014837          | 0.662696897                    | 0            | 0.651339137                     | 0             | 122.626151 |
| NFIB extended  | 0.02909622 | 30              | 20.6830136          | 0.661565145                    | 0            | 0.66797875                      | 0             | 97.0653349 |
| MAFG           | 0.02269999 | 97              | 15.9115576          | 0.657937609                    | 0            | 0.637922924                     | 0             | 85.2650057 |
| NFE2           | 0.03331666 | 57              | 23.8313782          | 0.614905916                    | 0            | 0.603613637                     | 0             | 96.5411953 |
| NFATC4         | 0.01979853 | 69              | 13.7471294          | 0.56950047                     | 0            | 0.590883932                     | 0             | 68.9261269 |
| MAX            | 0.02544935 | 20              | 17.9625269          | 0.540462883                    | 0            | 0.529925322                     | 0             | 74.161333  |
| RUNX1          | 0.02505451 | 11              | 17.6679799          | 0.524717466                    | 0            | 0.518738809                     | 0             | 71.4400473 |
| FOSB           | 0.02456624 | 20              | 17.3037445          | 0.485245648                    | 0            | 0.453751773                     | 0             | 65.4190599 |
| SOX18 extended | 0.01835729 | 21              | 12.6719869          | 0.485045421                    | 0            | 0.52092829                      | 0             | 56.5275168 |
| FOSB extended  | 0.01765359 | 25              | 12.1470441          | 0.471721116                    | 0            | 0.439246647                     | 0             | 53.9107161 |
| SOX18          | 0.02376554 | 13              | 16.7064383          | 0.418107011                    | 0            | 0.456639522                     | 0             | 55.4414521 |
| MAZ            | 0.02440078 | 192             | 17.1803151          | 0.409785291                    | 0            | 0.460090891                     | 0             | 55.0594071 |
| JUNB           | 0.03694968 | 24              | 26.5415378          | 0.285053173                    | 0            | 0.260712389                     | 0             | 47.1307655 |
| AHR            | 0.01628705 | 10              | 11.1276295          | 0.277212232                    | 0            | 0.263919037                     | 0             | 30.4303402 |
| JUN            | 0.02505944 | 11              | 17.6716556          | 0.234544146                    | 1.58E-277    | 0.253025464                     | 0             | 31.93622   |
| ARID3A         | 0.01709701 | 10              | 11.7318487          | -0.043773082                   | 5.61E-11     | -0.03972222                     | 2.74E-09      | -4.923121  |
| CTCF           | 0.07150696 | 13              | 52.3205701          | -0.173759075                   | 2.51E-151    | -0.204422814                    | 6.74E-210     | -39.96639  |
| HMGA1          | 0.13989533 | 14              | 103.336913          | -0.275355943                   | 0            | -0.231425345                    | 4.75E-270     | -88.586866 |
| ASCL2          | 0.0197481  | 15              | 13.7095057          | -0.364582767                   | 0            | -0.304554882                    | 0             | -44.068884 |
| IKZF1          | 0.01668427 | 27              | 11.4239548          | -0.407287905                   | 0            | -0.459792033                    | 0             | -45.251028 |
| CEBPG          | 0.02301372 | 29              | 16.1455963          | -0.56688495                    | 0            | -0.516712541                    | 0             | -73.971027 |

**Table S1. Calculation of proliferation and transition rates (related to Figure 3).**

**Table S2. Results of single GFP<sup>+</sup> iLSC plating experiment (related to Figure 3).**

**Table S3. The 42 genes ranked by the p value of their expression difference between LSC<sup>+</sup> and LSC<sup>-</sup> primary AML cell fractions (related to Figure 5).**

**Table S4. TF “regulons” that correlate with the iLSC score (related to Figure 6).**
